# Supplementary material for: From microkinetic model to process: understanding the role of the boron nitride surface and gas phase chemistry in the oxidative dehydrogenation of propane
Source: Royal Society of Chemistry journal article supplement (doi:10.1039/d3re00600j), 2024-01-01
Supplement: d3re00600j1.xlsx [file d3re00600j1.xlsx]

## Sheet: Sheet1
Catalyst	Mass Catalyst (g)	Mass Diluent (g)	Tube ID (cm)	Thermowell OD (cm)	Thermowell tip distance within bed (%)	Bed Height (cm)	V_reactive subtracting thermowell (mL)	T (degC)	Total Flow (mLn/min)	WHSV (g-C3H8/g-cat/h)	GHSV (L-norm-C3H8/L/h)	Feed % C3H8	Feed % O2	Conversion	C3H6 Selectivity	C2H4 Selectivity	Olefin Selectivity	Carbon Balance	Flow of Propane (mol/s)	Rate of Propane Consumption (mol/kg-cat/s)	Rate of Propane Consumption (L-norm/L/h)
hBN	0.1003	0.5001	0.7	0.3	0.75	2	0.663661	550	25	8.80962	678.057	0.3	0.15	0.253451	0.528604	0.183374	0.711978	0.991571	5.57705e-06	0.0140928	171.854
hBN	0.1003	0.5001	0.7	0.3	0.75	2	0.663661	550	30	10.5715	813.668	0.3	0.15	0.216588	0.559248	0.174957	0.734205	1.00009	6.69245e-06	0.0144517	176.231
hBN	0.1003	0.5001	0.7	0.3	0.75	2	0.663661	550	40	14.0954	1084.89	0.3	0.15	0.151421	0.608437	0.161781	0.770218	1.00518	8.92327e-06	0.0134713	164.275
hBN	0.1003	0.5001	0.7	0.3	0.75	2	0.663661	550	60	21.1431	1627.34	0.3	0.15	0.0966784	0.656511	0.151583	0.808094	1.0064	1.33849e-05	0.0129016	157.328
hBN	0.1003	0.5001	0.7	0.3	0.75	2	0.663661	550	70	24.6669	1898.56	0.3	0.15	0.0826543	0.669174	0.14966	0.818835	1.00155	1.56157e-05	0.0128685	156.924
hBN	0.1003	0.5001	0.7	0.3	0.75	2	0.663661	550	80	28.1908	2169.78	0.3	0.15	0.0664573	0.683643	0.146446	0.830089	1.00679	1.78465e-05	0.0118249	144.198
hBN	0.1003	0.5001	0.7	0.3	0.75	2	0.663661	530	25	8.80962	678.057	0.3	0.15	0.14957	0.627364	0.131276	0.75864	0.994609	5.57705e-06	0.00831666	101.417
hBN	0.1003	0.5001	0.7	0.3	0.75	2	0.663661	530	40	14.0954	1084.89	0.3	0.15	0.0909536	0.682168	0.120338	0.802506	1.00177	8.92327e-06	0.00809176	98.6747
hBN	0.1003	0.5001	0.7	0.3	0.75	2	0.663661	530	50	17.6192	1356.11	0.3	0.15	0.06975	0.703876	0.116661	0.820537	1.0025	1.11541e-05	0.00775671	94.589
hBN	0.1003	0.5001	0.7	0.3	0.75	2	0.663661	530	60	21.1431	1627.34	0.3	0.15	0.0578049	0.716232	0.114249	0.830482	0.995392	1.33849e-05	0.00771399	94.068
hBN	0.1003	0.5001	0.7	0.3	0.75	2	0.663661	510	25	8.80962	678.057	0.3	0.15	0.0753646	0.712412	0.0918149	0.804227	0.98966	5.57705e-06	0.00419055	51.1015
hBN	0.1003	0.5001	0.7	0.3	0.75	2	0.663661	510	40	14.0954	1084.89	0.3	0.15	0.0435112	0.745139	0.0857204	0.830859	0.990178	8.92327e-06	0.00387101	47.2049
hBN	0.1003	0.5001	0.7	0.3	0.75	2	0.663661	510	50	17.6192	1356.11	0.3	0.15	0.0338793	0.757695	0.0839108	0.841605	0.993192	1.11541e-05	0.00376762	45.9441
hBN	0.1003	0.5001	0.7	0.3	0.75	2	0.663661	510	60	21.1431	1627.34	0.3	0.15	0.0288489	0.765706	0.0826931	0.848399	0.993289	1.33849e-05	0.00384985	46.9468
hBN	0.1003	0.5001	0.7	0.3	0.75	2	0.663661	490	20	7.0477	542.445	0.3	0.15	0.0478978	0.742036	0.0656514	0.807687	0.988091	4.46164e-06	0.00213063	25.9819
hBN	0.1003	0.5001	0.7	0.3	0.75	2	0.663661	490	25	8.80962	678.057	0.3	0.15	0.0386842	0.760407	0.064637	0.825044	0.990717	5.57705e-06	0.00215099	26.2301
hBN	0.1003	0.5001	0.7	0.3	0.75	2	0.663661	490	30	10.5715	813.668	0.3	0.15	0.0306901	0.772184	0.0635373	0.835721	0.989282	6.69245e-06	0.00204778	24.9716
hBN	0.1003	0.5001	0.7	0.3	0.75	2	0.663661	490	40	14.0954	1084.89	0.3	0.15	0.0214451	0.784712	0.0619406	0.846653	0.994787	8.92327e-06	0.00190788	23.2656
hBN	0.1003	0.5001	0.7	0.3	0.75	2	0.663661	490	60	21.1431	1627.34	0.3	0.15	0.0139416	0.801438	0.0603929	0.861831	0.995647	1.33849e-05	0.00186049	22.6876
hBN	0.0504	0.25	0.4	0.3	0	2.75	0.345575	550	20	14.0255	1041.74	0.3	0.15	0.0649543	0.684471	0.149615	0.834085	1.00209	4.46164e-06	0.00575005	67.6656
hBN	0.0504	0.25	0.4	0.3	0	2.75	0.345575	550	30	21.0382	1562.61	0.3	0.15	0.0370422	0.70354	0.14234	0.84588	0.993907	6.69245e-06	0.00491872	57.8826
hBN	0.0504	0.25	0.4	0.3	0	2.75	0.345575	550	40	28.0509	2083.48	0.3	0.15	0.0244619	0.712446	0.139012	0.851458	1.00463	8.92327e-06	0.00433095	50.9659
hBN	0.0504	0.25	0.4	0.3	0	2.75	0.345575	550	40	28.0509	2083.48	0.3	0.15	0.0245532	0.718233	0.139854	0.858088	1.00247	8.92327e-06	0.00434712	51.1562
hBN	0.0504	0.25	0.4	0.3	0	2.75	0.345575	550	60	42.0764	3125.22	0.3	0.15	0.0140998	0.721243	0.135242	0.856486	1.0026	1.33849e-05	0.00374454	44.0651
hBN	0.0504	0.25	0.4	0.3	0	2.75	0.345575	550	70	49.0892	3646.1	0.3	0.15	0.0129055	0.729449	0.13533	0.864779	1.00096	1.56157e-05	0.0039986	47.0548
hBN	0.0504	0.25	0.4	0.3	0	2.75	0.345575	550	80	56.1019	4166.97	0.3	0.15	0.00979921	0.726519	0.133386	0.859905	1.005	1.78465e-05	0.00346988	40.833
hBN	0.0504	0.25	0.4	0.3	0	2.75	0.345575	550	20	7.01274	520.871	0.15	0.075	0.0304894	0.652917	0.192349	0.845267	1.00423	2.23082e-06	0.00134953	15.881
hBN	0.0504	0.25	0.4	0.3	0	2.75	0.345575	550	30	10.5191	781.306	0.15	0.075	0.0179502	0.657033	0.186342	0.843375	0.993769	3.34623e-06	0.00119178	14.0246
hBN	0.0504	0.25	0.4	0.3	0	2.75	0.345575	550	40	14.0255	1041.74	0.15	0.075	0.011079	0.654858	0.178965	0.833823	1.00897	4.46164e-06	0.000980767	11.5415
hBN	0.0504	0.25	0.4	0.3	0	2.75	0.345575	550	40	14.0255	1041.74	0.15	0.075	0.00289279	0.643245	0.16614	0.809385	0.997147	4.46164e-06	0.000256083	3.01354
hBN	0.0504	0.25	0.4	0.3	0	2.75	0.345575	550	60	21.0382	1562.61	0.15	0.075	0.00512571	0.651125	0.17438	0.825505	1.00172	6.69245e-06	0.000680626	8.00949
hBN	0.0504	0.25	0.4	0.3	0	2.75	0.345575	550	70	24.5446	1823.05	0.15	0.075	0.00412274	0.621213	0.162281	0.783493	0.999409	7.80786e-06	0.000638686	7.51595
hBN	0.0504	0.25	0.4	0.3	0	2.75	0.345575	550	80	28.0509	2083.48	0.15	0.075	0.00290239	0.643245	0.16614	0.809385	1.00046	8.92327e-06	0.000513866	6.04709
hBN	0.0504	0.25	0.4	0.3	0	2.75	0.345575	550	20	4.67516	347.247	0.1	0.05	0.0214042	0.623859	0.217813	0.841672	0.984935	1.48721e-06	0.000631599	7.43254
hBN	0.0504	0.25	0.4	0.3	0	2.75	0.345575	550	30	7.01274	520.871	0.1	0.05	0.0123299	0.616416	0.210006	0.826422	0.997466	2.23082e-06	0.000545751	6.42231
hBN	0.0504	0.25	0.4	0.3	0	2.75	0.345575	550	40	9.35032	694.494	0.1	0.05	0.00669132	0.605691	0.19915	0.804841	1.01061	2.97442e-06	0.000394898	4.64709
hBN	0.0504	0.25	0.4	0.3	0	2.75	0.345575	550	40	9.35032	694.494	0.1	0.05	0.00746125	0.623452	0.200285	0.823737	1.00717	2.97442e-06	0.000440336	5.1818
hBN	0.0504	0.25	0.4	0.3	0	2.75	0.345575	550	60	14.0255	1041.74	0.1	0.05	0.00248069	0.554669	0.178481	0.73315	0.996383	4.46164e-06	0.000219602	2.58424
hBN	0.0504	0.25	0.4	0.3	0	2.75	0.345575	550	70	16.3631	1215.37	0.1	0.05	0.0018661	0.581397	0.164801	0.746198	0.999641	5.20524e-06	0.000192728	2.26799
hBN	0.0504	0.25	0.4	0.3	0	2.75	0.345575	550	80	18.7006	1388.99	0.1	0.05	0.00139485	0.511963	0.162901	0.674864	0.998884	5.94885e-06	0.000164637	1.93742
B2O3	0.0496	0.2493	0.4	0.3	0	2.25	0.282743	550	25	17.8146	1591.55	0.3	0.15	0.0812251	0.705016	0.142949	0.847964	0.978492	5.57705e-06	0.00913299	129.274
B2O3	0.0496	0.2493	0.4	0.3	0	2.25	0.282743	550	30	21.3775	1909.86	0.3	0.15	0.0621325	0.722288	0.138885	0.861173	0.983283	6.69245e-06	0.00838345	118.664
B2O3	0.0496	0.2493	0.4	0.3	0	2.25	0.282743	550	40	28.5034	2546.48	0.3	0.15	0.0428185	0.730655	0.132409	0.863064	0.995736	8.92327e-06	0.00770325	109.036
B2O3	0.0496	0.2493	0.4	0.3	0	2.25	0.282743	550	60	42.7551	3819.72	0.3	0.15	0.0250597	0.721837	0.122616	0.844453	0.995544	1.33849e-05	0.00676255	95.7212
B2O3	0.0496	0.2493	0.4	0.3	0	2.25	0.282743	550	70	49.8809	4456.34	0.3	0.15	0.0199613	0.737663	0.122548	0.86021	0.997318	1.56157e-05	0.00628449	88.9545
B2O3	0.0496	0.2493	0.4	0.3	0	2.25	0.282743	550	25	8.90731	795.775	0.15	0.075	0.0479021	0.663626	0.176841	0.840467	0.988597	2.78852e-06	0.00269307	38.1193
B2O3	0.0496	0.2493	0.4	0.3	0	2.25	0.282743	550	30	10.6888	954.93	0.15	0.075	0.0374195	0.674071	0.175457	0.849528	0.99122	3.34623e-06	0.00252448	35.733
B2O3	0.0496	0.2493	0.4	0.3	0	2.25	0.282743	550	40	14.2517	1273.24	0.15	0.075	0.0254371	0.685589	0.169297	0.854886	1.00507	4.46164e-06	0.00228812	32.3875
B2O3	0.0496	0.2493	0.4	0.3	0	2.25	0.282743	550	60	21.3775	1909.86	0.15	0.075	0.0140666	0.677321	0.161678	0.838999	0.994882	6.69245e-06	0.00189798	26.8652
B2O3	0.0496	0.2493	0.4	0.3	0	2.25	0.282743	550	70	24.9405	2228.17	0.15	0.075	0.0111965	0.683917	0.160876	0.844793	0.992192	7.80786e-06	0.00176251	24.9477
B2O3	0.0496	0.2493	0.4	0.3	0	2.25	0.282743	550	30	7.12585	636.62	0.1	0.05	0.0272113	0.648278	0.198488	0.846766	1.00125	2.23082e-06	0.00122386	17.3233
B2O3	0.0496	0.2493	0.4	0.3	0	2.25	0.282743	550	60	14.2517	1273.24	0.1	0.05	0.00966501	0.671759	0.195118	0.866877	0.998351	4.46164e-06	0.00086939	12.3059
B2O3	0.0496	0.2493	0.4	0.3	0	2.25	0.282743	550	70	16.627	1485.45	0.1	0.05	0.00789359	0.671436	0.193177	0.864613	1.00397	5.20524e-06	0.000828388	11.7255
B2O3†	0.0499	0.9509	0.7	0.3	0.5	5	1.74751	550	60	42.498	618.022	0.3	0.15	0.215738	0.593874	0.185438	0.779312	0.980354	1.33849e-05	0.0578684	133.331
B2O3†	0.0499	0.9509	0.7	0.3	0.5	5	1.74751	550	70	49.581	721.026	0.3	0.15	0.165023	0.627894	0.168279	0.796174	0.994165	1.56157e-05	0.0516424	118.986
B2O3†	0.0499	0.9509	0.7	0.3	0.5	5	1.74751	550	30	21.249	309.011	0.3	0.15	0.124273	0.634971	0.149567	0.784538	1.00268	6.69245e-06	0.0166672	38.4018
B2O3†	0.0499	0.9509	0.7	0.3	0.5	5	1.74751	550	60	42.498	618.022	0.3	0.15	0.106467	0.653827	0.14729	0.801117	0.999886	1.33849e-05	0.0285582	65.7992
B2O3†	0.0499	0.9509	0.7	0.3	0.5	5	1.74751	550	70	49.581	721.026	0.3	0.15	0.0890777	0.682703	0.148543	0.831246	0.993508	1.56157e-05	0.027876	64.2273
Empty Tube	0	0	0.4	0.3	0	9	1.13097	550	20	-	318.31	0.3	0.15	0.0575733	0.70812	0.144675	0.852795	1.00761	4.46164e-06	-	18.3261
Empty Tube	0	0	0.4	0.3	0	9	1.13097	550	30	-	477.465	0.3	0.15	0.033019	0.731896	0.135493	0.86739	0.996295	6.69245e-06	-	15.7654
Empty Tube	0	0	0.4	0.3	0	9	1.13097	550	40	-	636.62	0.3	0.15	0.0207805	0.736283	0.13142	0.867703	1.00375	8.92327e-06	-	13.2293
Empty Tube	0	0	0.4	0.3	0	9	1.13097	550	40	-	636.62	0.3	0.15	0.0239985	0.736734	0.133291	0.870026	1.00876	8.92327e-06	-	15.2779
Empty Tube	0	0	0.4	0.3	0	9	1.13097	550	60	-	954.93	0.3	0.15	0.012349	0.748273	0.127354	0.875627	1.00398	1.33849e-05	-	11.7924
Empty Tube	0	0	0.4	0.3	0	9	1.13097	550	70	-	1114.08	0.3	0.15	0.0101429	0.759848	0.128473	0.888321	1.00447	1.56157e-05	-	11.3001
Empty Tube	0	0	0.4	0.3	0	9	1.13097	550	80	-	1273.24	0.3	0.15	0.0086673	0.765659	0.12856	0.894219	1.01008	1.78465e-05	-	11.0356
Empty Tube	0	0	0.4	0.3	0	9	1.13097	550	20	-	159.155	0.15	0.075	0.0191309	0.684201	0.174414	0.858615	1.00806	2.23082e-06	-	3.04478
Empty Tube	0	0	0.4	0.3	0	9	1.13097	550	30	-	238.732	0.15	0.075	0.012634	0.627959	0.15247	0.780429	0.997881	3.34623e-06	-	3.01615
Empty Tube	0	0	0.4	0.3	0	9	1.13097	550	40	-	318.31	0.15	0.075	0.00751511	0.691544	0.165753	0.857297	1.01335	4.46164e-06	-	2.39213
Empty Tube	0	0	0.4	0.3	0	9	1.13097	550	40	-	318.31	0.15	0.075	0.00872979	0.668597	0.160492	0.829089	1.01162	4.46164e-06	-	2.77878
Empty Tube	0	0	0.4	0.3	0	9	1.13097	550	60	-	477.465	0.15	0.075	0.00430091	0.701618	0.164374	0.865991	1.00484	6.69245e-06	-	2.05353
Empty Tube	0	0	0.4	0.3	0	9	1.13097	550	70	-	557.042	0.15	0.075	0.00359784	0.679956	0.157751	0.837707	1.00333	7.80786e-06	-	2.00415
Empty Tube	0	0	0.4	0.3	0	9	1.13097	550	80	-	636.62	0.15	0.075	0.00293647	0.691522	0.163271	0.854793	1.0042	8.92327e-06	-	1.86942
Empty Tube	0	0	0.4	0.3	0	9	1.13097	550	20	-	106.103	0.1	0.05	0.0124098	0.636351	0.191039	0.82739	0.989325	1.48721e-06	-	1.31672
Empty Tube	0	0	0.4	0.3	0	9	1.13097	550	30	-	159.155	0.1	0.05	0.00735708	0.633194	0.185397	0.81859	0.999418	2.23082e-06	-	1.17092
Empty Tube	0	0	0.4	0.3	0	9	1.13097	550	40	-	212.207	0.1	0.05	0.00473176	0.652537	0.189309	0.841846	1.01861	2.97442e-06	-	1.00411
Empty Tube	0	0	0.4	0.3	0	9	1.13097	550	40	-	212.207	0.1	0.05	0.00511001	0.659092	0.18744	0.846533	1.01977	2.97442e-06	-	1.08438
Empty Tube	0	0	0.4	0.3	0	9	1.13097	550	60	-	318.31	0.1	0.05	0.00288235	0.596679	0.167277	0.763956	1.00508	4.46164e-06	-	0.917482
Empty Tube	0	0	0.4	0.3	0	9	1.13097	550	70	-	371.362	0.1	0.05	0.00215051	0.608839	0.175512	0.784351	1.00352	5.20524e-06	-	0.798618
Empty Tube	0	0	0.4	0.3	0	9	1.13097	550	80	-	424.413	0.1	0.05	0.00173563	0.641057	0.175375	0.816433	1.00288	5.94885e-06	-	0.736623
Empty Tube	0	0	0.9	0.3	0.5	12	7.20996	550	40	-	99.8619	0.3	0.15	0.281257	0.528948	0.191311	0.720259	0.980692	8.92327e-06	-	28.0868
Empty Tube	0	0	0.9	0.3	0.5	12	7.20996	550	60	-	149.793	0.3	0.15	0.118248	0.653599	0.152217	0.805816	1.0073	1.33849e-05	-	17.7127
Empty Tube	0	0	0.9	0.3	0.5	12	7.20996	550	80	-	199.724	0.3	0.15	0.0895991	0.678127	0.146595	0.824722	1.00608	1.78465e-05	-	17.8951
Empty Tube	0	0	0.9	0.3	0.5	12	7.20996	550	100	-	249.655	0.3	0.15	0.058823	0.701558	0.139241	0.840799	1.00397	2.23082e-05	-	14.6855
Empty Tube	0	0	0.9	0.3	1	18	10.1788	490	40	-	70.7355	0.3	0.15	0.0844698	0.753393	0.074482	0.827875	1.00007	8.92327e-06	-	5.97502
Empty Tube	0	0	0.9	0.3	1	18	10.1788	490	50	-	88.4194	0.3	0.15	0.0617232	0.774616	0.0699167	0.844533	0.997814	1.11541e-05	-	5.45753
Empty Tube	0	0	0.9	0.3	1	18	10.1788	490	60	-	106.103	0.3	0.15	0.0419421	0.797822	0.0653071	0.863129	1.00072	1.33849e-05	-	4.45019
Empty Tube	0	0	0.9	0.3	1	18	10.1788	490	70	-	123.787	0.3	0.15	0.0330526	0.807584	0.0632406	0.870825	0.995402	1.56157e-05	-	4.09149
Empty Tube	0	0	0.9	0.3	1	18	10.1788	490	80	-	141.471	0.3	0.15	0.0295868	0.811662	0.0630519	0.874714	0.994552	1.78465e-05	-	4.18567
Empty Tube	0	0	0.9	0.3	1	18	10.1788	490	100	-	176.839	0.3	0.15	0.0200258	0.823543	0.0600105	0.883554	0.994032	2.23082e-05	-	3.54134
Empty Tube	0	0	0.9	0.3	1	18	10.1788	490	120	-	212.207	0.3	0.15	0.0135763	0.843498	0.0584094	0.901907	0.985973	2.67698e-05	-	2.88098
250ppm O3	0	0	0.9	0.3	1	18	10.1788	490	40	-	70.7355	0.3	0.15	0.327764	0.526146	0.134651	0.660797	0.971791	8.92327e-06	-	23.1846
250ppm O3	0	0	0.9	0.3	1	18	10.1788	490	60	-	106.103	0.3	0.15	0.158162	0.633095	0.0874498	0.720545	1.0015	1.33849e-05	-	16.7815
250ppm O3	0	0	0.9	0.3	1	18	10.1788	490	80	-	141.471	0.3	0.15	0.0997519	0.668567	0.0772057	0.745772	1.00533	1.78465e-05	-	14.112
250ppm O3	0	0	0.9	0.3	1	18	10.1788	490	100	-	176.839	0.3	0.15	0.0724424	0.680298	0.072668	0.752966	1.00261	2.23082e-05	-	12.8106
250ppm O3	0	0	0.9	0.3	1	18	10.1788	490	120	-	212.207	0.3	0.15	0.0592565	0.6657	0.0688178	0.734518	0.993836	2.67698e-05	-	12.5746
250ppm NO	0	0	0.9	0.3	1	18	10.1788	490	40	-	70.7355	0.3	0.15	0.175595	0.658893	0.095031	0.753924	1.00003	8.92327e-06	-	12.4208
250ppm NO	0	0	0.9	0.3	1	18	10.1788	490	60	-	106.103	0.3	0.15	0.0821503	0.743815	0.0789532	0.822768	1.00943	1.33849e-05	-	8.71641
250ppm NO	0	0	0.9	0.3	1	18	10.1788	490	70	-	123.787	0.3	0.15	0.0635434	0.756059	0.0751164	0.831175	1.00753	1.56157e-05	-	7.86585
250ppm NO	0	0	0.9	0.3	1	18	10.1788	490	80	-	141.471	0.3	0.15	0.0542051	0.768448	0.0751648	0.843613	1.01005	1.78465e-05	-	7.66845
Notes
B2O3†	Diluent is quartz rather than silicon carbide. Thermowell distance in bed is an estimate.
